# Supplementary material for: Hexagonal prismatic dodecameric water cluster: a building unit of the five-fold interpenetrating six-connected supramolecular network
Source: Royal Society of Chemistry journal article supplement (doi:10.1039/c2cc34412b), 2012-01-01
Supplement: c2cc34412b.pdf [file c2cc34412b.pdf]

## Supporting Information

for

### Hexagon-prismatic dodecameric water cluster: a building unit of the five-fold interpenetrating six-connected supramolecular network

*Xiaoju Li,<sup>\*ab</sup> Xiahong Xu,<sup>a</sup> Daqiang Yuan,<sup>b</sup> Xiulan Weng<sup>a</sup>*

<sup>a</sup> *Fujian Key Laboratory of Polymer Materials, College of Materials Science and Engineering, Fujian Normal University, Fuzhou, Fujian, 350007, P.R. China. E-mail: [xiaojuli@fjnu.edu.cn](mailto:xiaojuli@fjnu.edu.cn).*

<sup>b</sup> *State Key Laboratory of Structural Chemistry, Fujian Institute of Research on the Structure of Matter, Chinese Academy of Sciences, Fuzhou, Fujian, 350002, P.R. China.*

## Experimental Section

**General methods:** IR spectra were recorded using KBr plates on a BIORAD model 3000 FTS spectrometer.  $^1\text{H}$  and  $^{13}\text{C}$  spectra were recorded on spectrometers at 300 and 75 MHz, respectively, by using  $\text{D}_2\text{O}$  as a locking solvent. Chemical shifts were reported in ppm relative TMS. Thermogravimetric analysis (TGA) measurements were carried out by heating samples at  $10\text{ }^\circ\text{C}/\text{min}$  from 25 to  $800\text{ }^\circ\text{C}$  in a dynamic nitrogen atmosphere (flow rate =  $70\text{ mL}/\text{min}$ ). Elemental analyses were performed on a CE-440 Elemental Analyzer.

### X-ray Crystallography.

Data collection for **1** was performed on Saturn 724 CCD diffractometer using graphite monochromated Mo- $K\alpha$  radiation ( $\lambda = 0.71073\text{ \AA}$ ). Intensity data set was collected using  $\omega$  scan technique and corrected for  $Lp$  effects. The primitive structures were solved with direct methods and refined on  $F2$  with full matrix least-squares methods using the SHELXS-97 and SHELXL-97 programs, respectively.<sup>1</sup> The non-hydrogen atoms were refined anisotropically. The hydrogen atoms of water were located from the difference Fourier map and refined isotropically. The hydrogen atoms of Bmib were geometrically fixed. CCDC:827350.

**Synthesis of  $[(\text{Bmib})_3(\text{H}_2\text{O})_{12}]_n$  (**1**):** Bmib was synthesized according to the modified literature method.<sup>2</sup>  $[(\text{Bmib})_3(\text{H}_2\text{O})_{12}]_n$  was prepared by allowing a solution of Bmib in MeOH and water (1:2, volume ratio) to slowly evaporate at room temperature. Colorless crystals of **1** were formed after a few days. Anal. Calcd (%) for  $\text{C}_{36}\text{H}_{78}\text{N}_{12}\text{O}_{12}$  (871.08): C, 49.64; N, 19.30; H, 9.03. Found: C, 49.71; N, 19.39; H, 8.79.  $^1\text{H}$  NMR:  $\delta$  6.92 (s, 2H), 6.80 (s, 2H), 3.85 (s, 4H), 2.22 (2, 6H), 1.63 (s, 4H);  $^{13}\text{C}$  NMR:  $\delta$  145.9, 125.5, 120.3, 45.2, 26.7, 11.6; IR ( $\text{KBr}, \text{cm}^{-1}$ ) 3113(s), 3088(s), 2985(w), 2958(s), 2924(w), 1643(w), 1523(m), 1498(s), 1466(w), 1444(m), 1425(s), 1374(vw), 1359(m), 1314(w), 1280(s), 1240(vw), 1206(vw), 1190(vw), 1145(m), 1123(s), 1075(vw), 979(s), 937(vw), 913(w), 777(s), 679(m). After **1** was heated at  $60\text{ }^\circ\text{C}$  in vacuo for 6h, Bmib was obtained as white power. Anal. Calcd (%) for  $\text{C}_{36}\text{H}_{54}\text{N}_{12}$  (654.90): C, 66.02; N, 25.67; H, 8.31. Found: 65.87; N, 25.29; H, 8.22.

## References

- (1) G. M. Sheldrick, SHELXTL-97, Program for the Solution of Crystal Structures, University of Göttingen: Germany 1997.
- (2) X. J. Li, Y. Z. Cai, Z. L. Fang, L. J. Wu, B. Wei, S. Lin, *Cryst. Growth Des.*, 2011, **11**, 4517-4524.

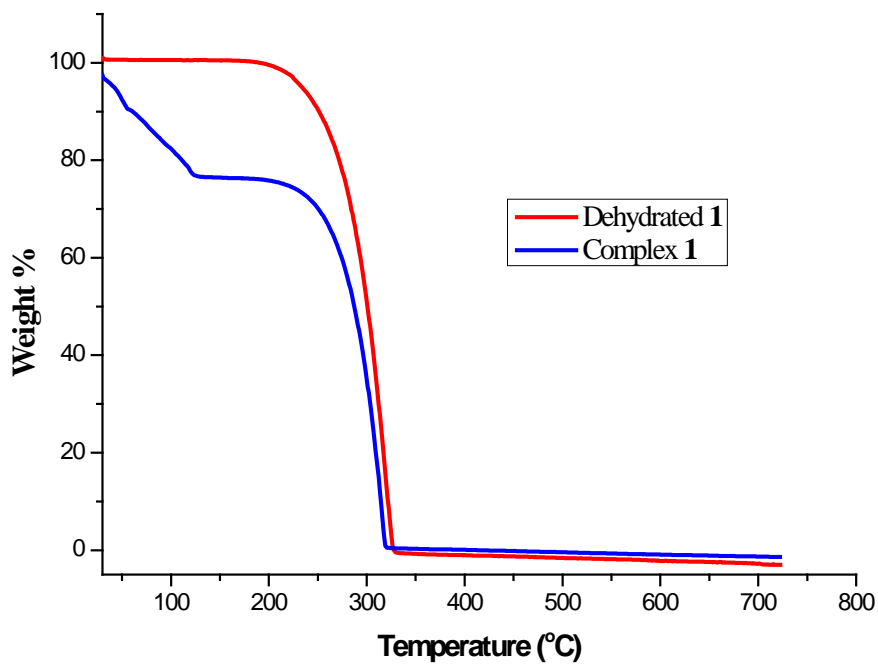

Figure S1 TGA curves of complex 1 and dehydrated 1.

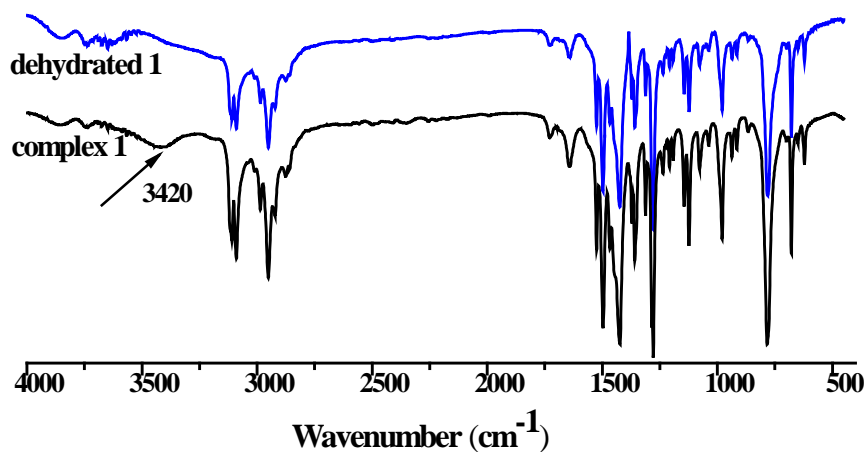

Figure S2 IR spectra of complex 1 and dehydrated 1.
